# Supplementary material for: Evaluation of Ligand-Inducible Expression Systems for Conditional Neuronal Manipulations of Sleep in Drosophila
Source: PubMed Central journal article supplement (PMC5068954; doi:10.1534/g3.116.034132), 2016-08-23
Supplement: supp_g3.116.034132_FigureS1.pdf [file supp_g3.116.034132_FigureS1.pdf]

**A**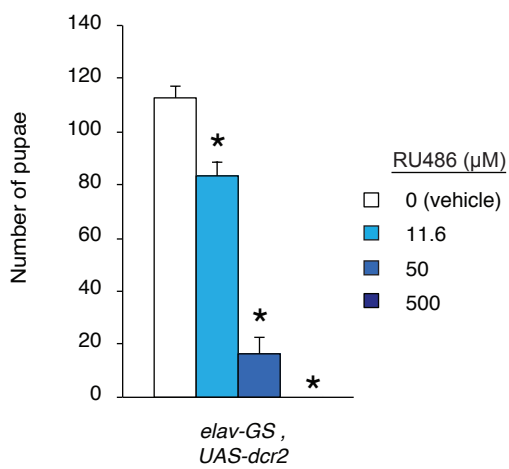**B**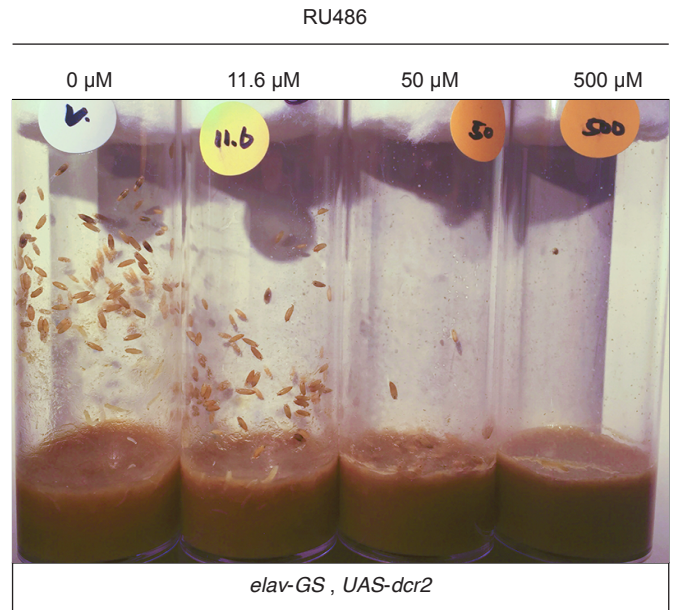**Figure S1****Developmental RU486 exposure is toxic to animals inheriting *elav-GS* paternally**

**A)** Pupal number is shown for animals inheriting indicated transgenes paternally and exposed developmentally to vehicle or to indicated RU486 concentrations. Mean  $\pm$  SEM is shown; \*  $p < 0.01$ , for comparisons to vehicle control. Data are averaged from two independently derived *elav-GS*, *UAS-dcr2* recombinant lines.

**B)** Side view photographs of vials containing progeny bearing indicated transgenes inherited paternally. Photographs were taken 10 days after crosses were initiated.
