# Supplementary material for: Evaluation of Ligand-Inducible Expression Systems for Conditional Neuronal Manipulations of Sleep in Drosophila
Source: PubMed Central journal article supplement (PMC5068954; doi:10.1534/g3.116.034132), 2016-08-23
Supplement: supp_g3.116.034132_FigureS2.pdf [file supp_g3.116.034132_FigureS2.pdf]

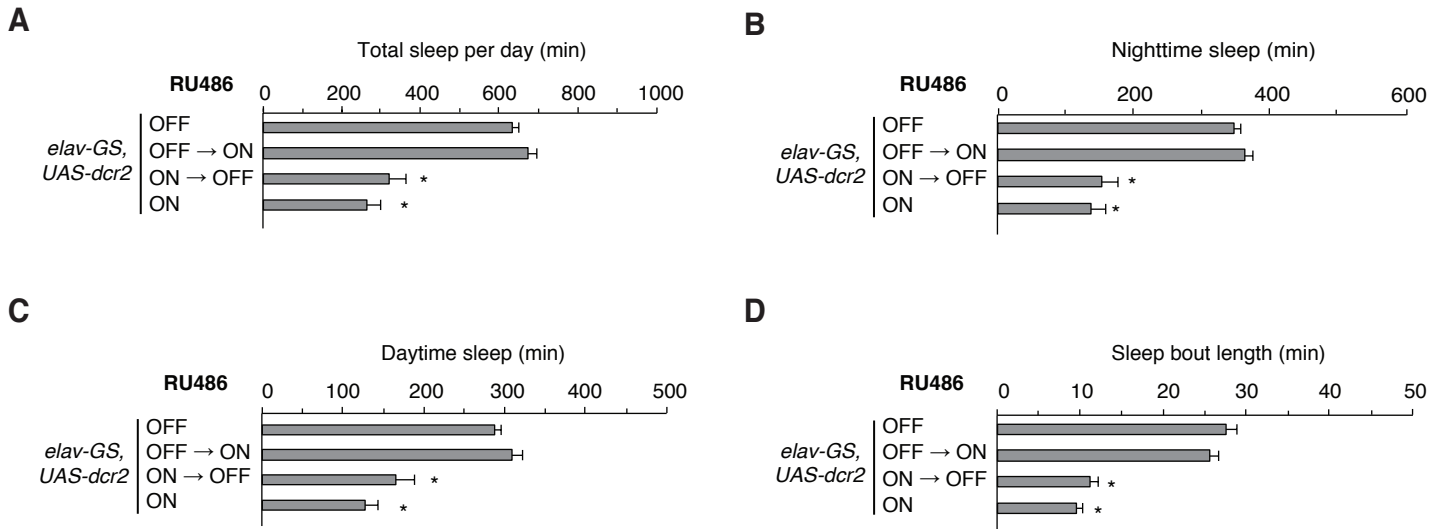

**Figure S2**

**Developmental or continuous RU486 exposure reduces sleep in animals inheriting *elav-GS* paternally**

(A-D) Sleep parameters are shown for animals inheriting the *elav-GS* and *UAS-dcr2* transgenes paternally and exposed to RU486 as indicated. Total sleep per day (A), nighttime sleep (B), daytime sleep (C), and sleep bout length (D) are plotted. Mean ± SEM is shown; n = 25-32, \*  $p < 0.01$  for comparisons to vehicle control condition within each genotype.
