# Supplementary material for: Evaluation of Ligand-Inducible Expression Systems for Conditional Neuronal Manipulations of Sleep in Drosophila
Source: PubMed Central journal article supplement (PMC5068954; doi:10.1534/g3.116.034132), 2016-08-23
Supplement: supp_g3.116.034132_FigureS3.pdf [file supp_g3.116.034132_FigureS3.pdf]

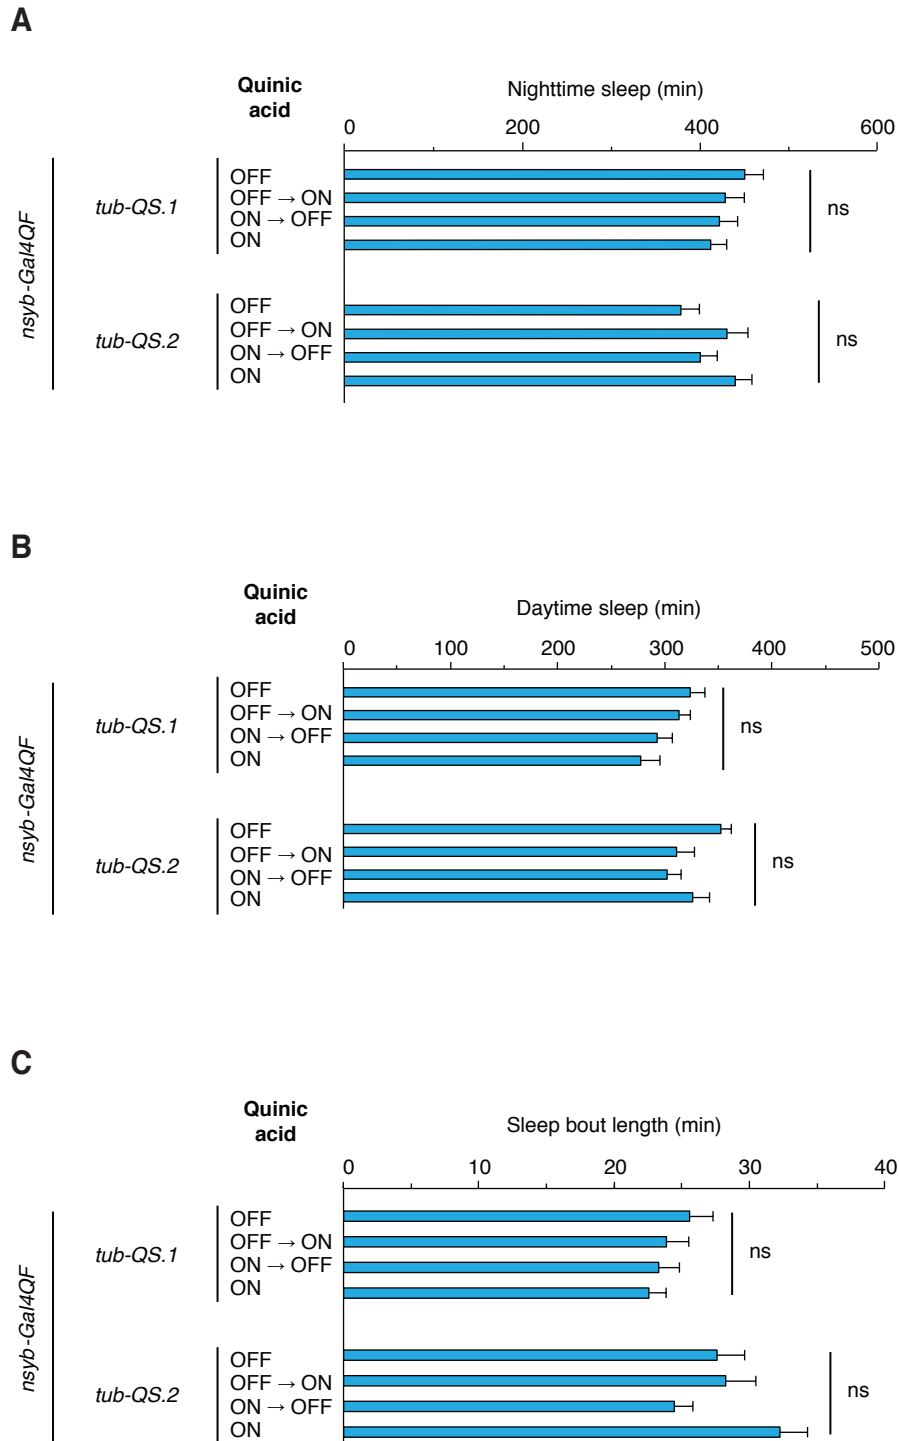

**Figure S3**

**Additional sleep parameters for animals undergoing neuronal Q-system induction**

**(A-C)** Average **(A)** nighttime sleep, **(B)** daytime sleep, and **(C)** sleep bout length is shown for animals bearing *tub-QS* and *nsyb-GAL4QF* and exposed to quinic acid as indicated. Mean  $\pm$  SEM is shown;  $n = 22-24$ , ns indicates  $p > 0.05$ .
